# Supplementary material for: Cracking the framework of bulk CuCN with flexible bipyrazolyl-based ligands to assemble [CuCN]n-based coordination polymers
Source: Royal Society of Chemistry journal article supplement (doi:10.1039/c0dt00249f), 2010-01-01
Supplement: c0dt00249f.pdf [file c0dt00249f.pdf]

## Supporting Information

# Cracking the framework of bulk CuCN with flexible bipyrazolyl-based ligands to assemble [CuCN]<sub>n</sub>-based coordination polymers†

Ling-Ling Li,<sup>a</sup> Lei-Lei Liu,<sup>a</sup> Ai-Xia Zheng,<sup>a</sup> Yu-Jie Chang,<sup>a</sup> Ming Dai,<sup>a</sup> Zhi-Gang Ren,<sup>a</sup>

Hong-Xi Li,<sup>a</sup> and Jian-Ping Lang<sup>\*a,b</sup>

<sup>a</sup> College of Chemistry, Chemical Engineering and Materials Science, Suzhou University, Suzhou 215123, P. R. China. Fax: 86-512-65880089; E-mail: [jplang@suda.edu.cn](mailto:jplang@suda.edu.cn)

<sup>b</sup> State Key Laboratory of Organometallic Chemistry, Shanghai Institute of Organic Chemistry, Chinese Academy of Sciences, Shanghai 200032, P. R. China

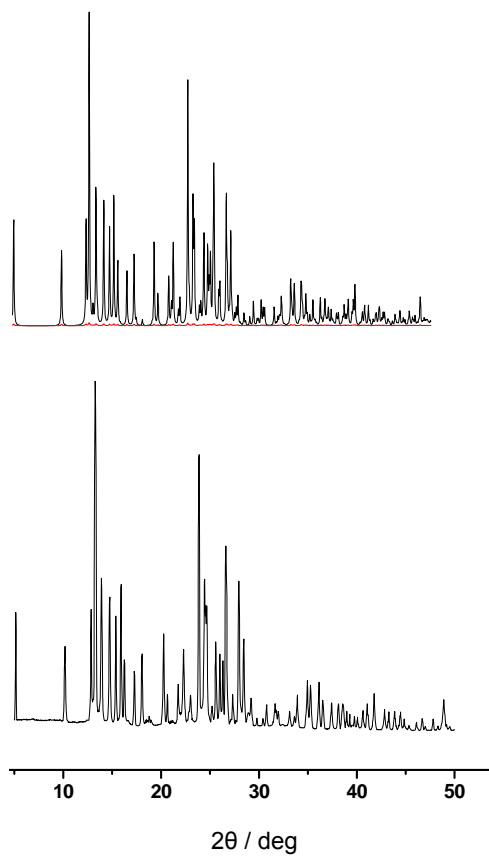

**Figure S1. Experimental (down) and simulated (up) PXRD patterns for 1.**

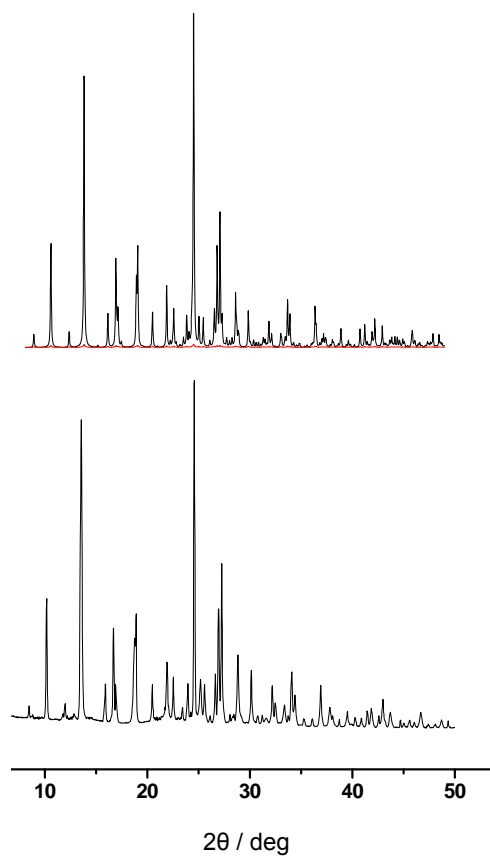

**Figure S2. Experimental (down) and simulated (up) PXRD patterns for 2.**

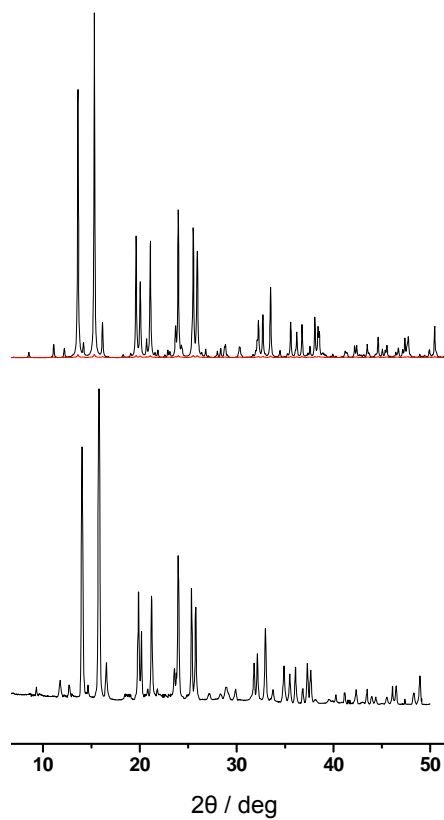

**Figure S3. Experimental (down) and simulated (up) PXR D patterns for 3.**

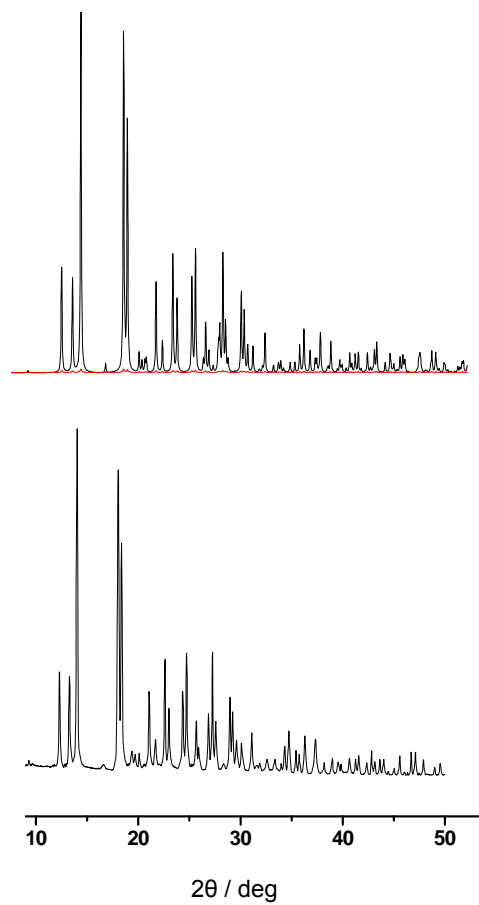

**Figure S4. Experimental (down) and simulated (up) PXR D patterns for 4.**

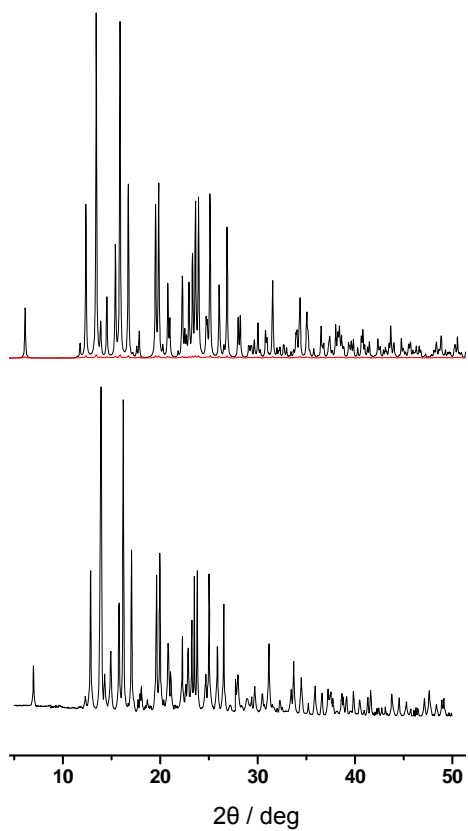

**Figure S5. Experimental (down) and simulated (up) PXRD patterns for 5.**

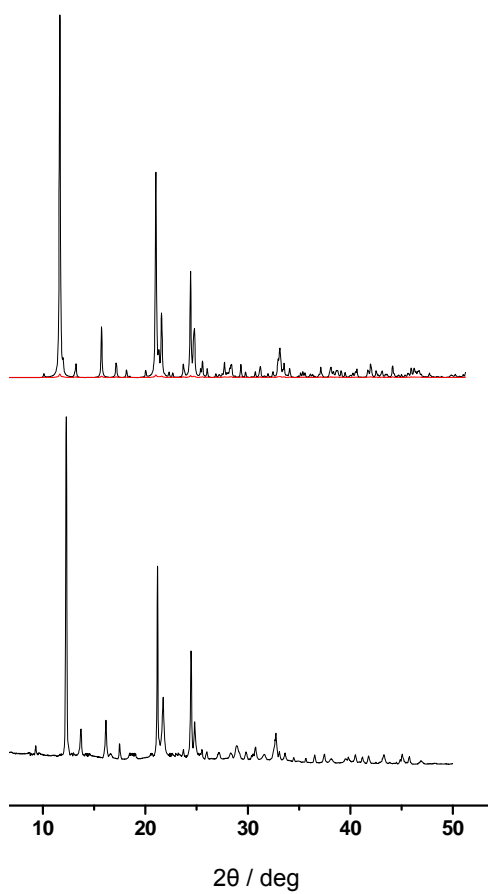

**Figure S6. Experimental (down) and simulated (up) PXRD patterns for 6.**
